# Supplementary material
Source: MDPI journal article supplement (https://www.mdpi.com/2313-4321/6/4/76)
Supplement: s1 [file s1]

**Table S1.** Key functional properties of PP for automotive application [24]

| Application type | Example                   | Key functional properties                                                                                                            |
|------------------|---------------------------|--------------------------------------------------------------------------------------------------------------------------------------|
| Exterior         | Bumper fascia             | lower coefficient of thermal expansion (LCTE), impact, rigidity, paint adhesion and durability (painted), UV resistance (nonpainted) |
|                  | Spoiler                   | Low T impact                                                                                                                         |
|                  | Bumper beam               | Energy absorption, rigidity                                                                                                          |
|                  | Side cladding, strips     | LCTE, impact, UV                                                                                                                     |
|                  | Rocker panels             | LCTE, impact, paintability                                                                                                           |
|                  | Wheel arch liners         | Impact                                                                                                                               |
| Interior         | Upper interior trim       | Impact, scratch resistance, rigidity                                                                                                 |
|                  | Lower interior trim       | Rigidity, impact                                                                                                                     |
|                  | Door panels, cases        | Impact, rigidity                                                                                                                     |
|                  | Seating structures        | Rigidity, impact                                                                                                                     |
|                  | Seating trim              | Rigidity, scratch resistance                                                                                                         |
|                  | Rigid instrument panel    | Impact, scratch resistance                                                                                                           |
|                  | Centre console            | Impact, scratch resistance, high T dimensional stability                                                                             |
|                  | Instrument panel retainer | Impact, dimensional stability                                                                                                        |
| Under hood       | Filter housings           | Rigidity, high T dimensional stability                                                                                               |
|                  | Fan shroud                | Rigidity, dynamic toughness                                                                                                          |
|                  | Fluid header tanks        | Impact, temp. resistance                                                                                                             |
|                  | Battery tray              | Rigidity, chemical resistance, dynamic toughness                                                                                     |
|                  | Air ducts, HVAC ducting   | Rigidity, high T dimensional stability                                                                                               |
|                  | Engine covers             | Impact, high-temperature rigidity                                                                                                    |
|                  | Front end                 | Rigidity, dynamic toughness                                                                                                          |
| Electrical       | Battery cases             | Chemical resistance, impact, low blush                                                                                               |
|                  | Cables                    | Flame retardancy, softness, temperature resistance                                                                                   |

**Table S2.** Data collected from product data sheets, R: recycled PP, V: virgin PP; PP types and compositions unknown

| Melt Flow Rate /<br>g 10min <sup>-1</sup> |       |      |      | Tensile Modulus /<br>MPa |      |      | Elongation at<br>Break / 1.-% |       |     | Yield Strength /<br>MPa |      |      |      | Impact Strength, 23°C<br>/ kJ m <sup>-2</sup> |      |     |     |
|-------------------------------------------|-------|------|------|--------------------------|------|------|-------------------------------|-------|-----|-------------------------|------|------|------|-----------------------------------------------|------|-----|-----|
| R                                         | R     | V    | V    | R                        | R    | V    | R                             | R     | V   | R                       | R    | V    | V    | R                                             | R    | V   | V   |
| 12.5                                      | 14    | 32   | 45   | 1200                     | 600  | 1600 | 50                            | 86    | 55  | 27                      | 36.2 | 33.3 | 28   | 5                                             | 4    | 1.5 | 4,2 |
| 20                                        | 10.83 | 24   | 1.8  | 1200                     | 606  | 1700 | 16                            | 51.15 | 65  | 24                      | 20   | 38.3 | 26   | 5.5                                           | 3.9  | 4   | 50  |
| 40                                        | 16.3  | 1.8  | 11   | 1200                     | 1150 | 1130 | 1.84                          | 50    | 500 | 24                      | 20   | 39   | 28   | 5.5                                           | 5.5  | 2   | 50  |
| 12                                        | 0.55  | 1.8  | 12   | 1200                     | 860  | 2500 | 1.64                          | 44.6  | 500 | 25                      |      | 40   | 30.8 | 5.5                                           | 2.6  | 5   | 25  |
| 12                                        | 50.4  | 12   | 20   | 1200                     | 611  | 1650 | 1.3                           | 45.4  | 600 | 25                      |      | 33   | 20.3 | 5.5                                           | 2.2  | 3.5 | 12  |
| 23                                        | 43.1  | 22   | 35   | 1200                     | 615  | 1300 | 1.24                          | 93    | 220 | 25                      |      | 32   | 31.4 | 5.5                                           | 3    | 3.5 | 8   |
| 43                                        | 47.4  | 8    | 2    | 1200                     | 625  | 500  | 0.99                          | 100   | 100 | 25                      |      | 30   | 26   | 5                                             | 3    | 3.5 | 13  |
| 10                                        | 17.8  | 25   | 3.5  | 1150                     | 1700 | 1300 | 1.02                          | 200   | 500 | 21                      |      | 36   | 25.6 | 4                                             | 2    | 3   | 8   |
| 8                                         | 20.6  | 25   | 0.25 | 1300                     | 1750 | 670  | 1.5                           |       | 3.3 | 27                      |      | 41   | 30   | 6.8                                           | 5.8  | 2.5 | 5   |
| 18.4                                      | 11.6  | 35   | 0.3  | 1100                     | 1800 | 600  | 2.5                           |       | 50  | 27                      |      | 15   | 25   | 4.8                                           | 4.7  | 7   | 12  |
| 20                                        | 6     | 47   | 1.9  | 1299                     | 1930 | 1000 | 2.48                          |       | 45  | 28                      |      | 35   | 23   | 1.9                                           | 8.4  | 8   | 7   |
| 0.803                                     | 7     | 4    | 1.5  | 1150                     | 2000 | 900  | 2.3                           |       | 50  | 10.6                    |      | 40   | 25   | 3.1                                           | 5.8  | 50  |     |
| 11.801                                    | 30    | 18   | 13   | 1373.1                   | 2040 | 900  | 2.3                           |       | 90  | 10.5                    |      | 36   | 25   | 2.2                                           | 10.4 | 12  |     |
| 12.772                                    | 7.7   | 3    | 70   | 1435.4                   | 1141 | 1150 | 2.58                          |       | 150 | 10.1                    |      | 30   | 23   | 2.8                                           | 8.1  | 8   |     |
| 3.932                                     |       | 3    | 110  | 1399.6                   | 2000 | 900  | 124                           |       | 250 | 11.2                    |      | 25   | 27   | 4.7                                           | 7.5  | 10  |     |
| 4.029                                     |       | 0.25 | 1.9  | 1414.2                   | 223  | 1100 | 1.74                          |       | 400 | 9.4                     |      | 28   | 25   | 5.6                                           | 7    | 5   |     |
| 7.114                                     |       | 0.3  | 20   | 1380.5                   |      | 1200 | 1.99                          |       | 60  | 38                      |      | 27   | 25   | 9.3                                           | 7.2  | 4   |     |
| 7.432                                     |       | 2.2  | 11   | 1467.9                   |      | 1100 | 1.59                          |       | 50  | 29.5                    |      | 25   | 27   | 9.3                                           | 2.1  | 50  |     |
| 10.9                                      |       | 3.3  | 135  | 1509.3                   |      | 1000 | 1.44                          |       | 25  | 29.4                    |      | 29   | 26   | 10.1                                          |      | 35  |     |
| 11                                        |       | 14   | 30   | 1515.7                   |      | 1150 | 1.6                           |       | 75  | 29.2                    |      | 31   | 23   | 3.8                                           |      | 50  |     |
| 11                                        |       | 3    | 30   | 1508.4                   |      | 1300 | 3.88                          |       |     | 34.75                   |      | 29   | 18   | 3.6                                           |      | 30  |     |
| 11                                        |       | 3    | 2    | 1552.9                   |      | 1300 | 3.28                          |       |     | 34.8                    |      | 28   | 25   | 3.2                                           |      | 8   |     |
| 11.8                                      |       | 4    | 12   | 1452.3                   |      | 1200 | 2.89                          |       |     | 35.16                   |      | 29.4 | 26   | 3.4                                           |      | 20  |     |
| 13.5                                      |       | 3    | 0.3  | 1502.7                   |      | 1250 | 3.57                          |       |     | 36                      |      | 29.4 | 24   | 3.4                                           |      | 11  |     |
| 6.5                                       |       | 2    | 1.3  | 1697.3                   |      | 1200 | 3.72                          |       |     | 36.1                    |      | 28   |      | 24.9                                          |      | 5   |     |
| 7.3                                       |       | 0.85 | 4    | 1573.2                   |      | 1500 | 3.55                          |       |     | 36.4                    |      | 28   |      | 12.2                                          |      | 5   |     |
| 8.16                                      |       | 0.3  | 3.5  | 1599.2                   |      | 1300 | 350                           |       |     | 36.5                    |      | 31   |      | 12.9                                          |      | 15  |     |
| 6.83                                      |       | 0.8  | 13   | 1481.3                   |      | 1000 | 370                           |       |     | 36.25                   |      | 28   |      | 6.5                                           |      | 20  |     |
| 8.3                                       |       | 1.3  | 12   | 1589.4                   |      | 1300 | 351                           |       |     | 20                      |      | 27   |      | 11.2                                          |      | 20  |     |
| 8.83                                      |       | 1.2  | 20   | 1549.7                   |      | 1200 | 325                           |       |     | 12.8                    |      | 28.3 |      | 4.2                                           |      | 7   |     |
| 8                                         |       | 0.8  | 12   | 1484                     |      | 1150 | 309                           |       |     | 34.7                    |      | 27   |      | 4.3                                           |      | 20  |     |
| 8.83                                      |       | 0.6  | 6.5  | 1556.5                   |      | 1120 | 21                            |       |     | 34.8                    |      | 25   |      | 3.5                                           |      | 6   |     |
| 11.3                                      |       | 1.5  | 8    | 1542.1                   |      | 1000 | 65.4                          |       |     | 35.2                    |      | 25   |      | 4.5                                           |      | 4   |     |
| 9.16                                      |       | 40   | 15   | 1282.4                   |      | 800  | 63.1                          |       |     | 35.9                    |      | 26   |      | 4.7                                           |      | 4.5 |     |
| 9.3                                       |       | 20   | 12   | 2039.3                   |      | 1200 | 61.5                          |       |     | 36                      |      | 24   |      | 4.6                                           |      | 7   |     |
| 12                                        |       | 3    | 20   | 1616.8                   |      | 2300 | 61.9                          |       |     | 36.3                    |      | 28   |      | 6.7                                           |      | 6   |     |
| 7.5                                       |       | 6    | 7    | 610                      |      | 1150 | 57.3                          |       |     | 36.4                    |      | 30   |      | 3.2                                           |      | 6.8 |     |

## File S1

References for polymer properties. Databases accessed March–July 2021.

1. J. Hopewell, R. Dvorak, E. Kosior, Phil. Trans. R. Soc. B 2009, 364, 2115.
2. Zwick GmbH & Co. KG, ISO 527 and ASTM D638 – explaining the difference 2006.
3. N. Jia, Val A. Kagan,  
[https://www.researchgate.net/publication/279890951\\_Compatibility\\_analysis\\_of\\_tensile\\_properties\\_of\\_polyamide\\_using\\_ASTM\\_and\\_ISO\\_testing\\_procedures](https://www.researchgate.net/publication/279890951_Compatibility_analysis_of_tensile_properties_of_polyamide_using_ASTM_and_ISO_testing_procedures).
4. J. Jansz, in Polypropylene, Vol. 2 (Ed.: J. Karger-Kocsis), Springer Netherlands. Dordrecht 1999, p. 643.
5. [https://mtm-plastics.eu/fileadmin/fuerAdmin/downloads/datenblaetter/Purpolen2021/FINAL\\_PDS\\_mtm\\_Purpolen\\_PP\\_GB\\_27\\_01\\_2021.p\\_df.pdf](https://mtm-plastics.eu/fileadmin/fuerAdmin/downloads/datenblaetter/Purpolen2021/FINAL_PDS_mtm_Purpolen_PP_GB_27_01_2021.p_df.pdf).
6. [https://www.gruener-punkt.de/fileadmin/Dateien/Downloads/PDFs/produktinformationen-systalen/englisch/Systalen\\_PP-C24000\\_gr000\\_E\\_rev02.pdf](https://www.gruener-punkt.de/fileadmin/Dateien/Downloads/PDFs/produktinformationen-systalen/englisch/Systalen_PP-C24000_gr000_E_rev02.pdf).
7. [https://mtm-plastics.eu/fileadmin/fuerAdmin/downloads/datenblaetter/Purpolen2021/FINAL\\_PDS\\_mtm\\_Purpolen\\_PPY\\_40\\_GB\\_19\\_03\\_2021\\_1\\_.pdf](https://mtm-plastics.eu/fileadmin/fuerAdmin/downloads/datenblaetter/Purpolen2021/FINAL_PDS_mtm_Purpolen_PPY_40_GB_19_03_2021_1_.pdf).
8. [https://mtm-plastics.eu/fileadmin/fuerAdmin/downloads/datenblaetter/Dipolen2021/FINAL\\_PDS\\_mtm\\_Dipolen\\_PP\\_GB\\_27\\_01\\_2021.pd\\_f.pdf](https://mtm-plastics.eu/fileadmin/fuerAdmin/downloads/datenblaetter/Dipolen2021/FINAL_PDS_mtm_Dipolen_PP_GB_27_01_2021.pd_f.pdf).
9. [https://www.gruener-punkt.de/fileadmin/Dateien/Downloads/PDFs/produktinformationen-systalen/englisch/Systalen\\_PP-C44000\\_gr000\\_E\\_rev03.pdf](https://www.gruener-punkt.de/fileadmin/Dateien/Downloads/PDFs/produktinformationen-systalen/englisch/Systalen_PP-C44000_gr000_E_rev03.pdf).
10. [https://www.nico-kunststoffe.de/fileadmin/Dateien/Datenblaetter/28\\_-\\_PP-Copo\\_\\_70REG\\_-\\_M\\_800\\_-\\_2020.pdf](https://www.nico-kunststoffe.de/fileadmin/Dateien/Datenblaetter/28_-_PP-Copo__70REG_-_M_800_-_2020.pdf).
11. [https://www.gruener-punkt.de/fileadmin/Dateien/Downloads/PDFs/produktinformationen-systalen/Systalen\\_PP-C47001\\_gr000\\_D\\_rev02.pdf](https://www.gruener-punkt.de/fileadmin/Dateien/Downloads/PDFs/produktinformationen-systalen/Systalen_PP-C47001_gr000_D_rev02.pdf).
12. [https://wilken-gruppe.de/wp-content/uploads/2021/03/download\\_569.pdf](https://wilken-gruppe.de/wp-content/uploads/2021/03/download_569.pdf).
13. [https://www.gruener-punkt.de/fileadmin/Dateien/Downloads/PDFs/produktinformationen-systalen/englisch/Systalen\\_PP-C45003\\_gr000\\_E\\_rev02.pdf](https://www.gruener-punkt.de/fileadmin/Dateien/Downloads/PDFs/produktinformationen-systalen/englisch/Systalen_PP-C45003_gr000_E_rev02.pdf).
14. <https://impact-recycling.com/post-consumer/>.
15. [https://www.replano.com/fileadmin/user\\_upload/replano/downloads/datasheet\\_pp\\_0515\\_engl.pdf](https://www.replano.com/fileadmin/user_upload/replano/downloads/datasheet_pp_0515_engl.pdf).
16. [https://www.interseroh.de/fileadmin/PDF/Technische\\_Produktdatenblaetter/Rezyklate\\_Feb\\_2020/TDS\\_recyten\\_R\\_PP\\_10\\_DE.pdf](https://www.interseroh.de/fileadmin/PDF/Technische_Produktdatenblaetter/Rezyklate_Feb_2020/TDS_recyten_R_PP_10_DE.pdf).
17. S. Möllnitz, M. Feuchter, I. Duretek, G. Schmidt, R. Pomberger, R. Sarc, Polymers 2021, 13.
18. [sunlight-recycling.com](https://sunlight-recycling.com). Author(s) 2016.
19. F. Alvarado Chacon, M. T. Brouwer, E. U. van Thoden Velzen, I. W. Smeding, A first assessment of the impact of impurities in PP and PE recycled plastics, Wageningen Food & Biobased Research, Wageningen 2020.
20. K. M. Hyie, S. Budin, N. Martinus, Z. Salleh, N. R. N. Mohd Masdek, J. Phys.: Conf. Ser. 2019.
21. D. S. Rosa, C. G. F. Guedes, C. L. Carvalho, Journal of Materials Science 2007, 42, 551.
22. J. Tocháček, J. Jančář, J. Kalfus, S. Hermanová, Polymer Degradation and Stability 2011, 96, 491.
23. <https://kiweb-omnexus-us.specialchem.com/product/t-a-schulman-icorene-n4435>.
24. <https://kiweb-omnexus-us.specialchem.com/product/t-exxonmobil-chemical-achieve-advanced-pp6035g1>.
25. <https://kiweb-omnexus-us.specialchem.com/product/t-exxonmobil-chemical-achieve-advanced-pp6282ne2>.
26. <https://kiweb-omnexus-us.specialchem.com/product/t-ansa-termoplastici-ansalene-pp-at-a02-000-0000-at>.
27. <https://kiweb-omnexus-us.specialchem.com/product/t-admajoris-majoris-cw337-7731>.
28. <http://www.politecsrl.com/ppnero>.
29. <https://kiweb-omnexus-us.specialchem.com/product/t-borealis-ba204e>.
30. <https://plastics.ulprospector.com/datasheet/e305581/analene-q-570>.
31. <https://plastics.ulprospector.com/datasheet/e157720/borclear-rc737mo>.
32. <https://plastics.ulprospector.com/datasheet/e78879/bormed-rb845mo>.
33. <https://plastics.ulprospector.com/datasheet/e80582/borealis-pp-bc250mo>.
34. <https://plastics.ulprospector.com/datasheet/e276279/4prop-5c14300>.
35. <https://plastics.ulprospector.com/datasheet/e75552/accuguard-cp0467v0csl>.
36. <https://plastics.ulprospector.com/datasheet/e276266/4prop-25c16225>.
37. <https://plastics.ulprospector.com/datasheet/e75536/accucomp-cp0404l>.
38. <https://plastics.ulprospector.com/datasheet/e124400/borealis-pp-ba160e-8229-01>.
39. <https://plastics.ulprospector.com/datasheet/e75535/accucomp-cp0407l>.
40. <https://kiweb-omnexus-us.specialchem.com/product/t-avient-formerly-polyone-gravi-tech-gt5200-5023-ld-natural-70>.

41. <https://kiweb-omnexus-us.specialchem.com/product/t-avient-formerly-polyone-gravi-tech-grv-pp-030-io-black>.
42. <https://kiweb-omnexus-us.specialchem.com/product/t-a-schulman-percom-a4400>.
43. <https://kiweb-omnexus-us.specialchem.com/product/t-borealis-borclean-hb311bf>.
44. <https://kiweb-omnexus-us.specialchem.com/product/t-avient-formerly-polyone-gravi-tech-gt5200-5027-ld-natural-70>.
45. <https://kiweb-omnexus-us.specialchem.com/product/t-borealis-be52>.
46. <https://kiweb-omnexus-us.specialchem.com/product/t-avient-formerly-polyone-gravi-tech-gt5200-5025-ld-natural-70>.
47. <https://plastics.ulprospector.com/datasheet/e129655/arak-pp-ep2x83ce>.
48. <https://kiweb-omnexus-us.specialchem.com/product/t-geon-performance-solutions-geon-ep6713-b1>.
49. <https://kiweb-omnexus-us.specialchem.com/product/t-borealis-ba110cf>.
50. <https://plastics.ulprospector.com/datasheet/e370604/axlene-35rm>.
51. <https://kiweb-omnexus-us.specialchem.com/product/t-borealis-bb213cf>.
52. <https://plastics.ulprospector.com/datasheet/e78802/borealis-pp-ra130e-8427>.
53. <https://plastics.ulprospector.com/datasheet/e381997/advance-400>.
54. <https://plastics.ulprospector.com/datasheet/e370599/axlene-12rm>.
55. <https://plastics.ulprospector.com/datasheet/e92818/borealis-pp-rj470mo>.
56. <https://kiweb-omnexus-us.specialchem.com/product/t-exxonmobil-chemical-achieve-advanced-pp1605>.
57. <https://plastics.ulprospector.com/datasheet/e80819/borealis-pp-rb307mo>.
58. <https://kiweb-omnexus-us.specialchem.com/product/t-a-schulman-lyondellbasell-accucomp-hp0309l>.
59. <https://plastics.ulprospector.com/datasheet/e251938/achieve-advanced-pp8285e1>.
60. <https://kiweb-omnexus-us.specialchem.com/product/t-a-schulman-icorene-n4420>.
61. <https://plastics.ulprospector.com/datasheet/e251948/achieve-advanced-pp7123kne1>.
62. <https://plastics.ulprospector.com/datasheet/e430782/analene-2088>.
63. <https://plastics.ulprospector.com/datasheet/e74728/bormod-bf970mo>.
64. <https://plastics.ulprospector.com/datasheet/e75541/accucomp-cp0425bav>.
65. <https://plastics.ulprospector.com/datasheet/e78867/bormed-be860mo>.
66. <https://plastics.ulprospector.com/datasheet/e75537/accucomp-cp0406l>.
67. <https://plastics.ulprospector.com/datasheet/e75538/accucomp-cp0403l>.
68. <https://plastics.ulprospector.com/datasheet/e276271/4prop-25c40000>.
69. <https://plastics.ulprospector.com/datasheet/e276263/4prop-25c10000>.
70. <https://plastics.ulprospector.com/datasheet/e74727/bormod-be961mo>.
71. <https://plastics.ulprospector.com/datasheet/e92740/borealis-pp-bc545mo>.
72. <https://plastics.ulprospector.com/datasheet/e80579/borealis-pp-bb125mo>.
73. <https://plastics.ulprospector.com/datasheet/e95518/bapolene-5062>.
74. <https://plastics.ulprospector.com/datasheet/e156250/adstif-ea5074>.
75. <https://plastics.ulprospector.com/datasheet/e407038/achieve-advanced-pp7925e1>.
76. <https://plastics.ulprospector.com/datasheet/e78880/bormed-rf825mo>.
77. <https://plastics.ulprospector.com/datasheet/e250912/borealis-pp-rj901mo>.
78. <https://plastics.ulprospector.com/datasheet/e80724/borealis-pp-re420mo>.
79. <https://plastics.ulprospector.com/datasheet/e80818/borealis-pp-rb206mo>.
80. <https://plastics.ulprospector.com/datasheet/e114510/borealis-pp-ra130e>.
81. <https://plastics.ulprospector.com/datasheet/e380906/bapolene-5021cm>.
82. <https://plastics.ulprospector.com/datasheet/e416771/analene-q-590>.
83. <https://plastics.ulprospector.com/datasheet/e246520/altech-pp-r-a-1000-312-im-uv>.
84. <https://plastics.ulprospector.com/datasheet/e381995/advance-150>.
85. <https://kiweb-omnexus-us.specialchem.com/product/t-geon-performance-solutions-geon-ep6130-b10>.
86. <https://kiweb-omnexus-us.specialchem.com/product/t-borealis-bb125mo>.
87. <https://kiweb-omnexus-us.specialchem.com/product/t-borealis-ba202e>.
88. <https://kiweb-omnexus-us.specialchem.com/product/t-avient-formerly-polyone-gravi-tech-gt5200-5028-ld-natural-70>.
89. <https://kiweb-omnexus-us.specialchem.com/product/t-avient-formerly-polyone-gravi-tech-gt5200-5026-ld-natural-70>.
90. <https://kiweb-omnexus-us.specialchem.com/product/t-avient-formerly-polyone-gravi-tech-gt5200-5024-ld-natural-70>.
91. <https://kiweb-omnexus-us.specialchem.com/product/t-borealis-borclean-hc300bf>.
92. <https://kiweb-omnexus-us.specialchem.com/product/t-borealis-beta-pp-be60-7032>.
93. <https://kiweb-omnexus-us.specialchem.com/product/t-borealis-be50-7032>.
94. <https://kiweb-omnexus-us.specialchem.com/product/t-avient-formerly-polyone-gravi-tech-gt5200-5023-ld-natural-70>.

95. <https://kiweb-omnexus-us.specialchem.com/product/t-ansa-termoplastici-ansalene-pp-fk-a02-000-1051-at>.
96. <https://kiweb-omnexus-us.specialchem.com/product/t-admajoris-majoris-ffr307c-8487>.
97. <https://kiweb-omnexus-us.specialchem.com/product/t-a-schulman-icorene-n4450>.
98. <https://kiweb-omnexus-us.specialchem.com/product/t-a-schulman-icorene-n4425>.
99. <https://kiweb-omnexus-us.specialchem.com/product/t-a-schulman-lyondellbasell-accucomp-hp0315l>.
100. <https://kiweb-omnexus-us.specialchem.com/product/t-a-schulman-lyondellbasell-accucomp-hp0306l>.
101. <https://kiweb-omnexus-us.specialchem.com/product/t-exxonmobil-chemical-achieve-advanced-pp6282ne1>.
102. <https://kiweb-omnexus-us.specialchem.com/product/t-exxonmobil-chemical-achieve-advanced-pp3854>.
103. <https://axiongroup.co.uk/wp-content/uploads/2018/09/axpoly-pp51-1000-product-information-sheet.pdf>.
